# Supplementary material for: Molecular insights into solid-state photochromism in bulk and confined N-salicylidenes
Source: Royal Society of Chemistry journal article supplement (doi:10.1039/d4tc02862g), 2024-01-01
Supplement: d4tc02862g1.pdf [file d4tc02862g1.pdf]

## **Molecular insights into solid-state photochromism**

### **in bulk and confined *N*-salicylidenes**

Kieran Griffiths, Harry Brough, Ryan J. Bragg, Nathan R. Halcovitch, John M. Griffin\*

Department of Chemistry, Lancaster University, Lancaster LA1 4YB, United Kingdom

## Supporting Information

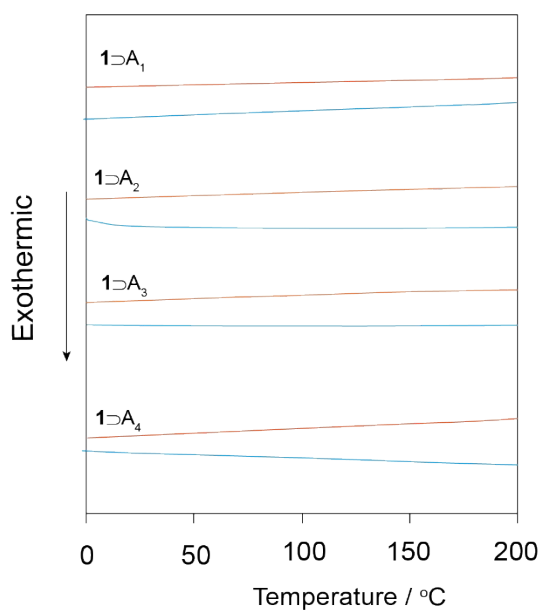

**Figure S1.** Differential scanning calorimetry traces of  $1\text{A}_n$ . Heating curves are shown in orange; cooling curves are shown in blue. No endothermic or exothermic features are observed which would be characteristic of melting or crystallisation of the crystalline *N*-salicylidenes. It can be assumed that excess *N*-salicylidene has been removed via vacuum treatment.

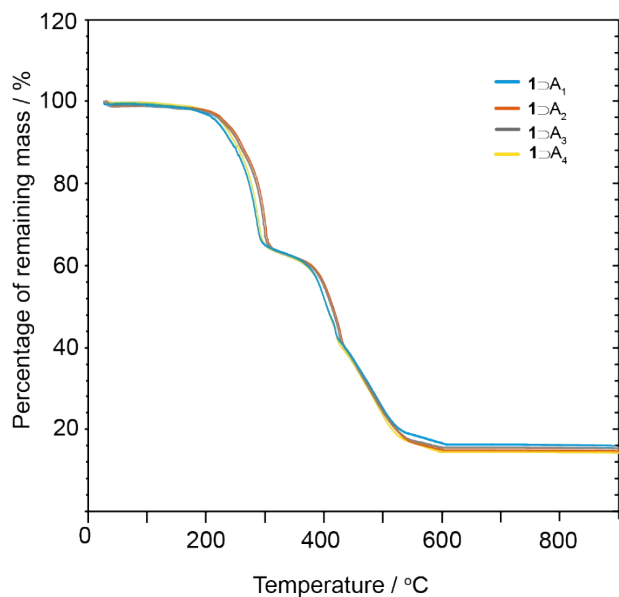

**Figure S2.** Thermogravimetric analysis traces of  $1\text{A}_n$ . Expected final mass for the general formula  $1\text{A}_{n(0.5)}$  was calculated to be 15%-16% based on  $\text{Al}_2\text{O}_3$ .  $1\text{A}_1$  (16.1%),  $1\text{A}_2$  (15.8%),  $1\text{A}_3$  (15.6%), and  $1\text{A}_4$  (14.9%).

**Table S1.** Crystallographic and calculated geometry optimised parameters for other reported polymorphs of  $A_n$  compounds not used in this study.

|                                | $A_1$        | $A_1$        | $A_2$      |
|--------------------------------|--------------|--------------|------------|
| Crystal System                 | Orthorhombic | Orthorhombic | Monoclinic |
| Space group                    | $P2_12_12_1$ | $Pbc2_1$     | $P2_1/c$   |
| Z                              | 4            | 4            | 4          |
| Photochromic                   | Yes          | No           | No         |
| Experimental torsion angle / ° | 45.4         | 6.6          | 2.3        |

**Table S2.** Comparison between calculated and experimental  $^{13}\text{C}$  imine chemical shifts at the experimental torsion angle.

| Structure | Experimental torsion angle / ° | Experimental $^{13}\text{C}$ imine chemical shift (ppm) | Calculated $^{13}\text{C}$ imine chemical shift at experimental torsion angle (ppm) |
|-----------|--------------------------------|---------------------------------------------------------|-------------------------------------------------------------------------------------|
| $A_1$     | 47.1                           | 162.1                                                   | 161.4                                                                               |
| $A_2$     | 47.0                           | 161.9                                                   | 161.0                                                                               |
| $A_3$     | 3.5                            | 155.4                                                   | 153.2                                                                               |
| $A_4$     | 5.7                            | 155.2                                                   | 155.8                                                                               |

**Table S3.** Torsional angles for anil structures  $A_1$ - $A_4$ , calculated by geometry optimisations with four methods. Fixed and unfixed refer to whether the unit cell parameters were allowed to relax during the geometry optimisation.

| Method         | $A_1$ | $A_2$ | $A_3$ | $A_4$ |
|----------------|-------|-------|-------|-------|
| Experimental   | 47.1  | 47.0  | 3.5   | 5.7   |
| PBE-D3 Fixed   | 45.6  | 43.9  | 10.7  | 7.8   |
| PBE-D3 Unfixed | 45.6  | 4.2   | 10.1  | 8.6   |
| rSCAN Fixed    | 46.1  | 45.7  | 10.1  | 8.7   |
| rSCAN Unfixed  | 46.0  | 45.7  | 11.4  | 9.0   |

**Table S4.** Calculated values of  $V_{\text{free}}$  for  $A_1$ - $A_4$  and  $1\supset A_1$  -  $1\supset A_4$ 

| Molecule | Volume of Molecule / $\text{\AA}^3$ | Crystalline Unit Cell Volume / $\text{\AA}^3$ | Z | $V_{\text{free}}$ per molecule / $\text{\AA}^3$ | $V_{\text{free}}$ per molecule occluded within <b>1</b> |
|----------|-------------------------------------|-----------------------------------------------|---|-------------------------------------------------|---------------------------------------------------------|
|----------|-------------------------------------|-----------------------------------------------|---|-------------------------------------------------|---------------------------------------------------------|

|                |        |          |   |      |          |                             |
|----------------|--------|----------|---|------|----------|-----------------------------|
| A <sub>1</sub> | 186.73 | 1023.38  | 4 | 69.1 | 279.4032 | Volume<br>of<br>the<br>cavi |
| A <sub>2</sub> | 200.27 | 1132.607 | 4 | 82.9 | 265.8632 |                             |
| A <sub>3</sub> | 200.27 | 1049.972 | 4 | 62.2 | 265.8632 |                             |
| A <sub>4</sub> | 266.13 | 2388.821 | 8 | 32.5 | 200.0032 |                             |

ty of **1** = 233.06 Å<sup>3</sup>.  $V_{\text{free}}$  per molecule was calculated using:

$$V_{\text{free}} = (V_{\text{cell}} - Z \cdot V_{\text{molecule}})/Z$$

where  $V_{\text{cell}}$  is the unit cell volume and  $V_{\text{molecule}}$  is the volume of a single molecule.

**Table S5.** Calculated <sup>13</sup>C chemical shieldings for A<sub>1</sub> and A<sub>3</sub> determined from single-molecule DFT calculations performed on fully optimised structures carbon sites numbered as shown in Figure 2 (main text).

| Site | A1<br>Calculated <sup>13</sup> C chemical<br>shielding (ppm) | A3<br>Calculated <sup>13</sup> C chemical<br>shielding (ppm) | Calculated <sup>13</sup> C chemical<br>shielding difference<br>(ppm) |
|------|--------------------------------------------------------------|--------------------------------------------------------------|----------------------------------------------------------------------|
| C1   | 29.6                                                         | 31.6                                                         | -2.0                                                                 |
| C2   | 75.8                                                         | 74.6                                                         | 1.2                                                                  |
| C3   | 59.9                                                         | 59.9                                                         | 0.0                                                                  |
| C4   | 75.9                                                         | 59.9                                                         | 16.0                                                                 |
| C5   | 60.3                                                         | 61.6                                                         | -1.3                                                                 |
| C6   | 72.8                                                         | 72.2                                                         | 0.6                                                                  |
| C7   | 32.0                                                         | 33.0                                                         | -1.0                                                                 |
| C8   | 42.6                                                         | 43.2                                                         | -0.6                                                                 |
| C9   | 67.5                                                         | 67.4                                                         | 0.1                                                                  |
| C10  | 64.1                                                         | 64.0                                                         | 0.1                                                                  |
| C11  | 67.2                                                         | 66.5                                                         | 0.7                                                                  |
| C12  | 63.8                                                         | 63.7                                                         | 0.1                                                                  |
| C13  | 76.3                                                         | 76.4                                                         | -0.1                                                                 |

Torsional angles for fully optimised molecular structures are 34.0° (A<sub>1</sub>) and 33.4° (A<sub>3</sub>)

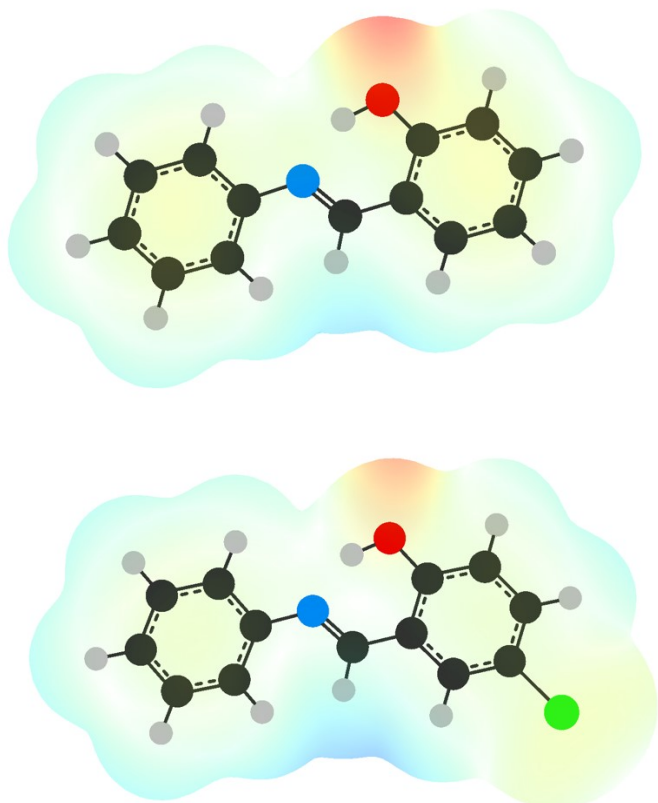

**Figure S3.** Electron density maps generated from single-molecule DFT calculations on A<sub>1</sub> (top) and A<sub>3</sub> (bottom). Atoms shown are carbon (black), nitrogen (blue), oxygen (red), hydrogen (grey) and chlorine (green).

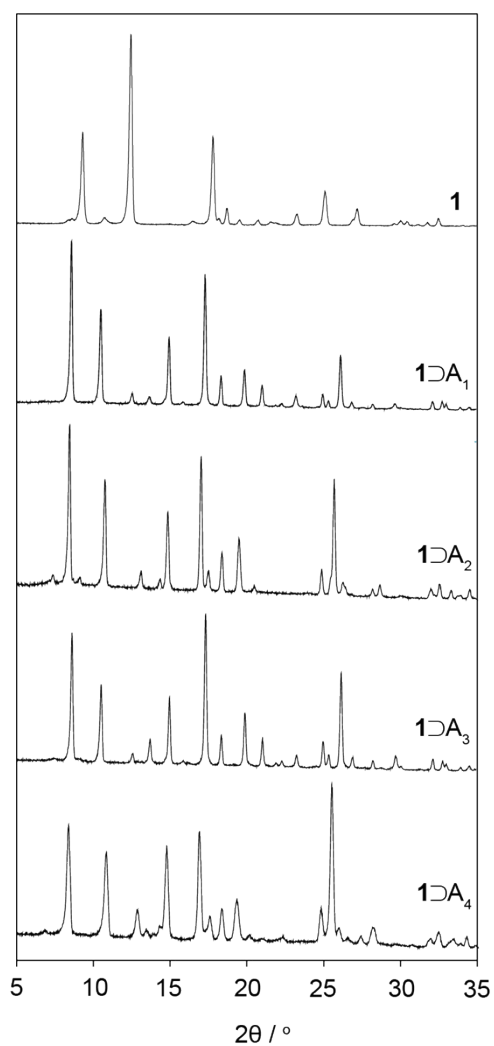

**Figure S4a)** Comparison of XRPD patterns of  $1DA_n$ .

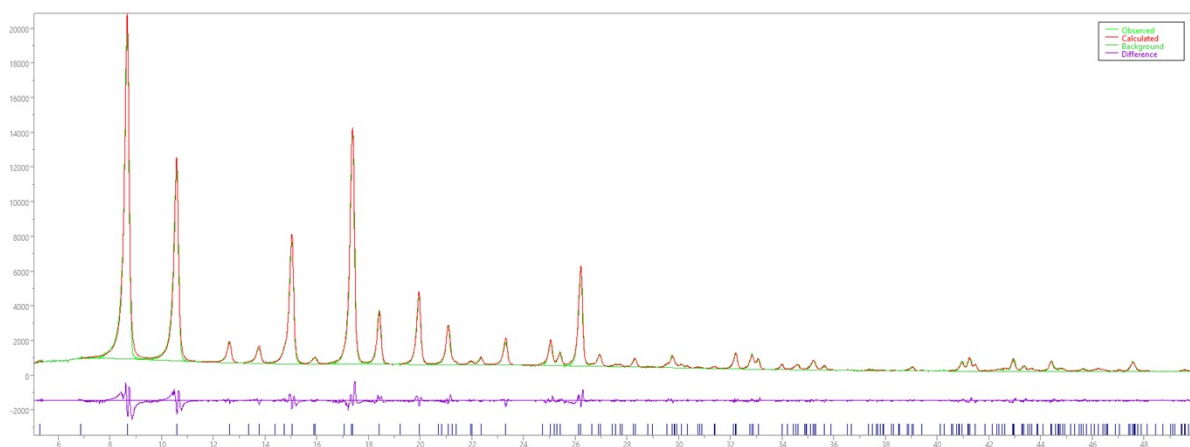

**Figure S4b)** Le Bail fit of  $1DA_1$ . Indexing was carried out by N-TREOR09 on EXPO2014. The crystal system was found to be orthorhombic. The lattice parameters were refined to be ,  $a = 12.87 \text{ \AA}$ ,  $b = 16.71 \text{ \AA}$  and  $c = 6.62 \text{ \AA}$ ,  $\alpha = \beta = \gamma = 90^\circ$ ,  $V = 1423.7 \text{ \AA}^3$ . The space group was found to be  $Imma$ . General formula  $AlC_{84}H_{68}N_4O_{20}$ . The reliability ( $R$ ) factor based on the powder profile was 5.122 %.

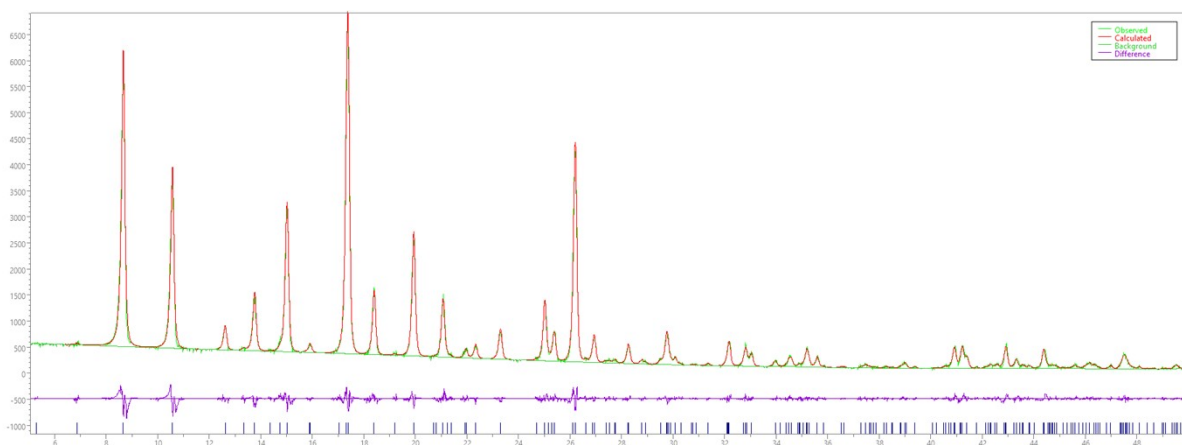

**Figure S4c)** Le Bail fit of  $1D A_3$ . Indexing was carried out by N-TREOR09 on EXPO2014. The crystal system was found to be orthorhombic. The lattice parameters were refined to be ,  $a = 12.87 \text{ \AA}$ ,  $b = 16.74 \text{ \AA}$  and  $c = 6.64 \text{ \AA}$ ,  $\alpha = \beta = \gamma = 90^\circ$ ,  $V = 1430.5 \text{ \AA}^3$ . The space group was found to be *Imma*. General formula  $AlC_{83}H_{68}N_4O_{20}Cl$ . The reliability (*R*) factor based on the powder profile was 7.237 %.

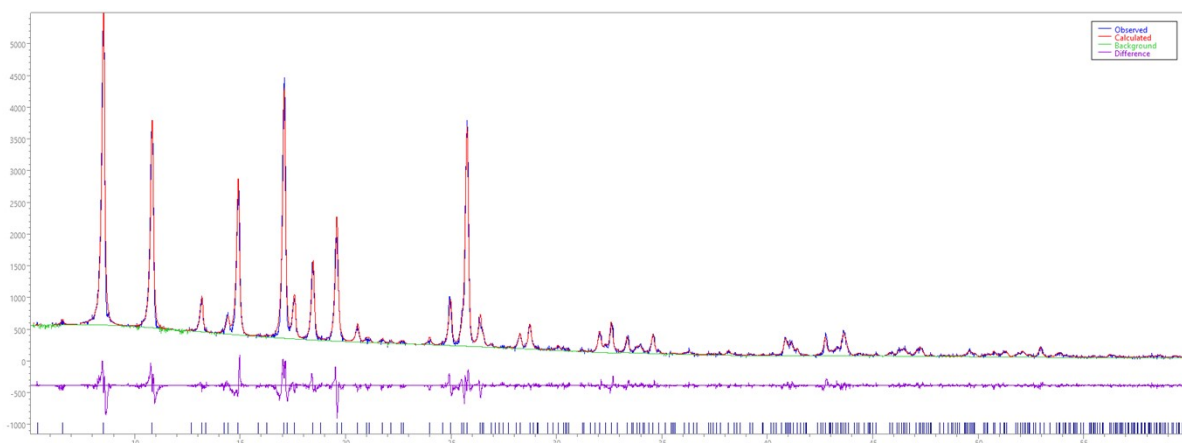

**Figure S4d)** Le Bail fit of  $1D A_2$ . Indexing was carried out by N-TREOR09 on EXPO2014. The crystal system was found to be orthorhombic. The lattice parameters were refined to be ,  $a = 13.44 \text{ \AA}$ ,  $b = 16.33 \text{ \AA}$  and  $c = 6.62 \text{ \AA}$ ,  $\alpha = \beta = \gamma = 90^\circ$ ,  $V = 1452.9 \text{ \AA}^3$ . The space group was found to be *Imma*. General formula  $AlC_{83}H_{68}N_4O_{20}Cl$ . The reliability (*R*) factor based on the powder profile was 9.111 %.

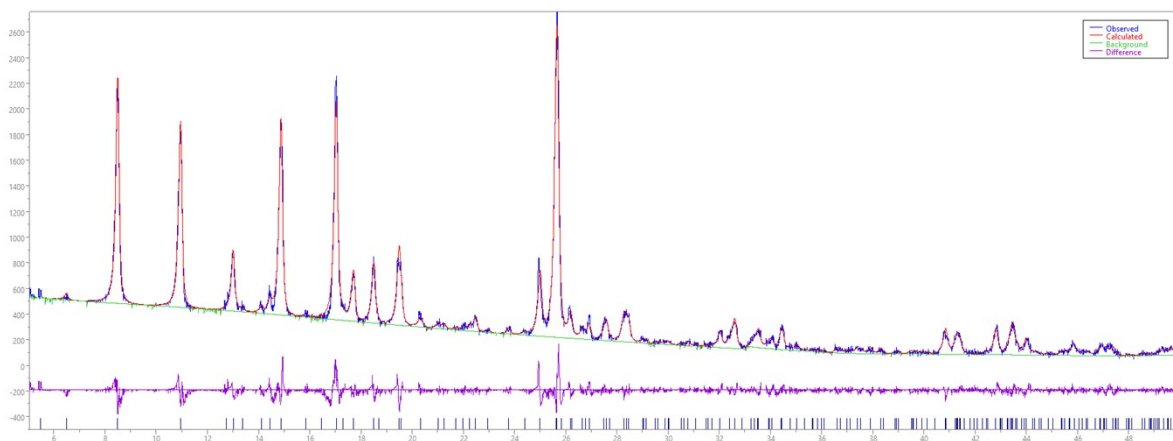

**Figure S4e)** Le Bail fit of  $1\text{D}_4$ . Indexing was carried out by N-TREOR09 on EXPO2014. The crystal system was found to be orthorhombic. The lattice parameters were refined to be ,  $a = 13.63 \text{ \AA}$ ,  $b = 16.16 \text{ \AA}$  and  $c = 6.63 \text{ \AA}$ ,  $\alpha=\beta=\gamma=90^\circ$ ,  $V = 1460.3 \text{ \AA}^3$ . The space group was found to be  $Imma$ . General formula  $\text{AlC}_{83}\text{H}_{68}\text{N}_4\text{O}_{20}\text{Cl}$ . The reliability ( $R$ ) factor based on the powder profile was 10.265 %.

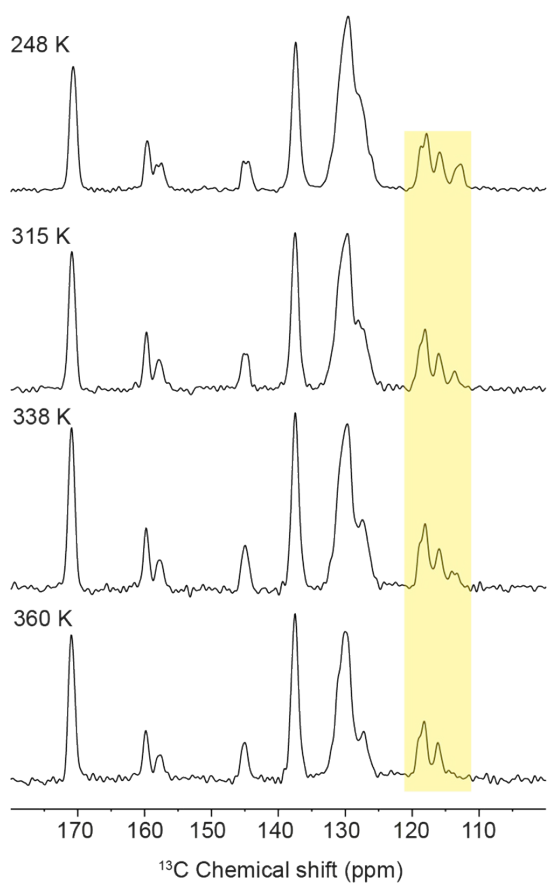

**Figure S5.** Variable-temperature  $^{13}\text{C}$  CPMAS NMR spectra of  $1\text{D}_1$ .



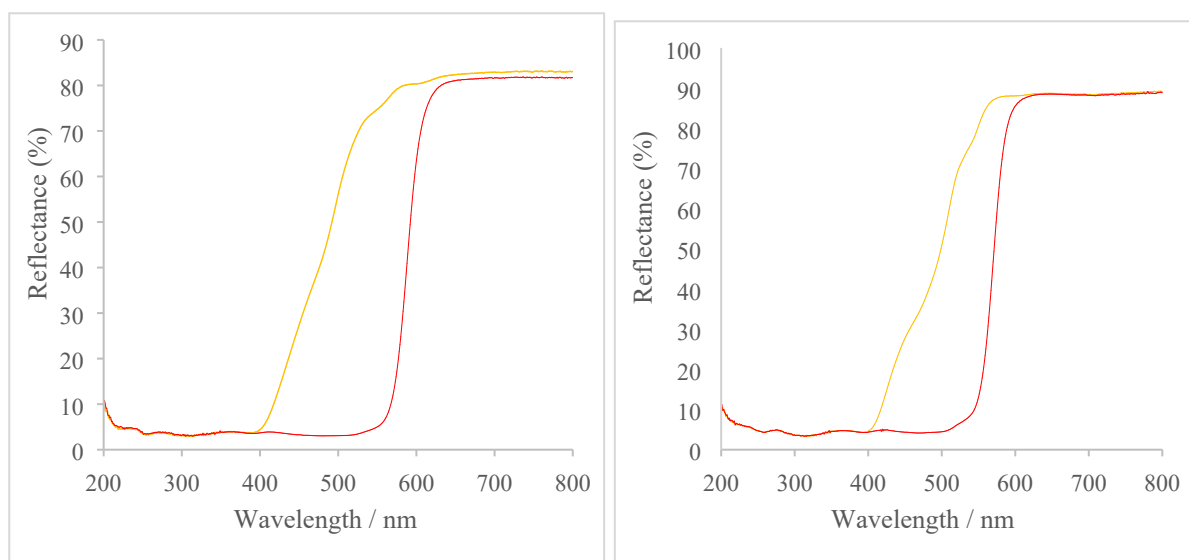

**Figure S6.** UV-vis reflectance spectra before irradiation (yellow) and after irradiation (red) of A<sub>1</sub> (left) and A<sub>2</sub> (right).

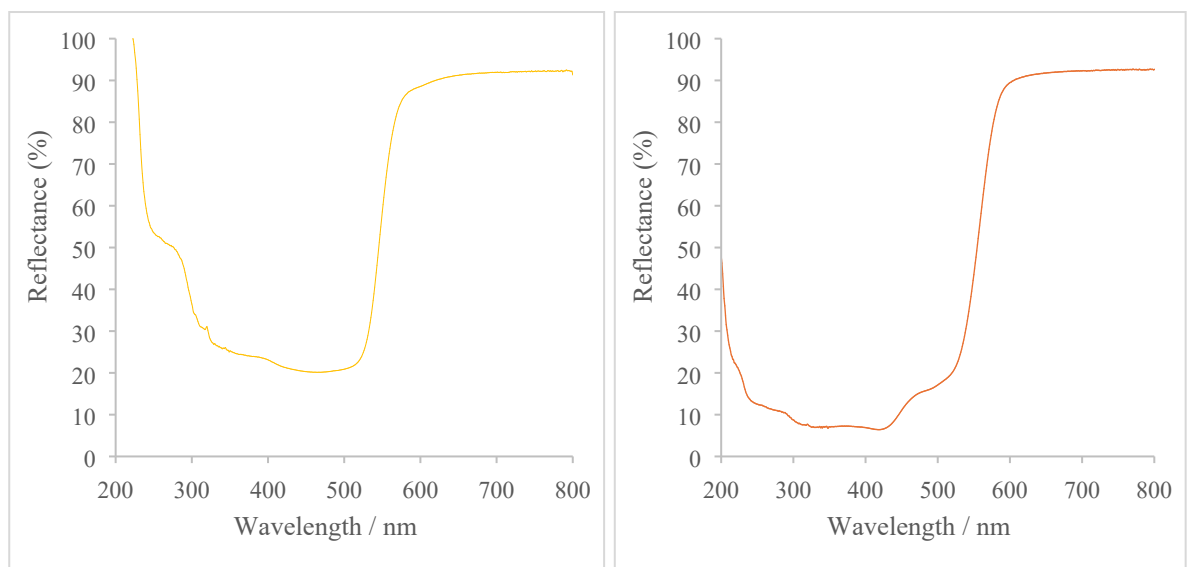

**Figure S7.** UV-vis reflectance spectra of bulk crystalline A<sub>3</sub> (left) and A<sub>4</sub> (right). UV-vis reflectance profiles remain the same after irradiation.

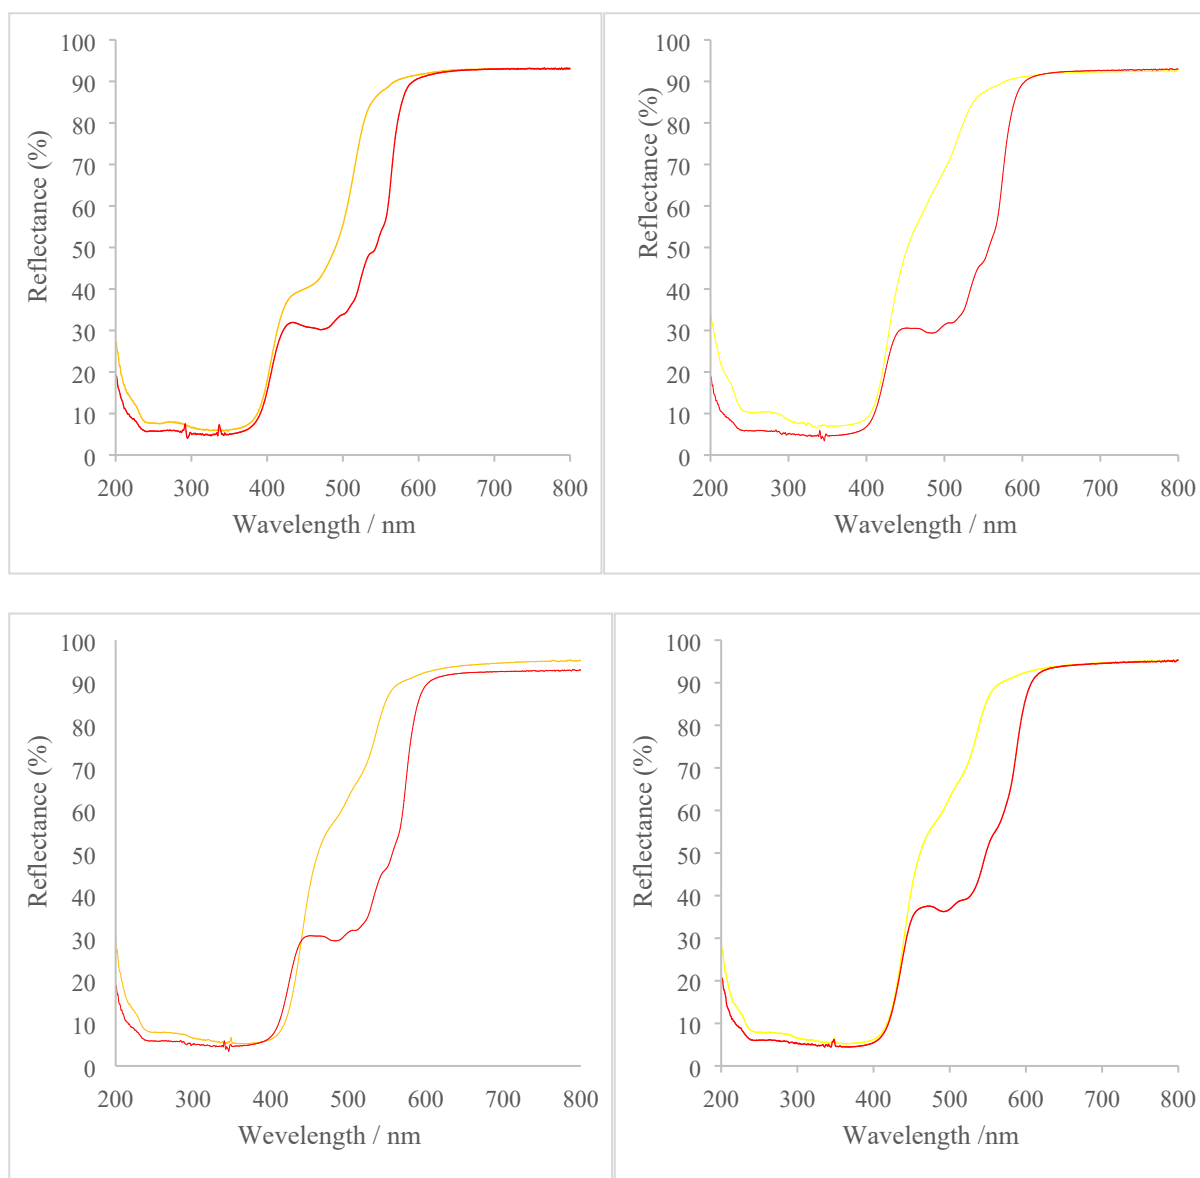

**Figure S8.** UV-vis reflectance spectra before irradiation (yellow) and after irradiation (red) of  $1\text{D}A_1$  (upper left),  $1\text{D}A_2$  (upper right),  $1\text{D}A_3$  (lower left), and  $1\text{D}A_4$  (lower right).

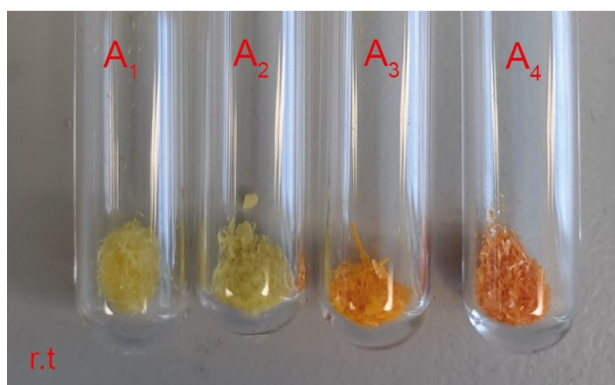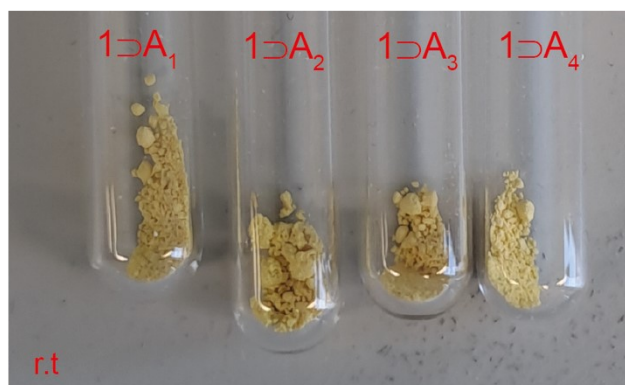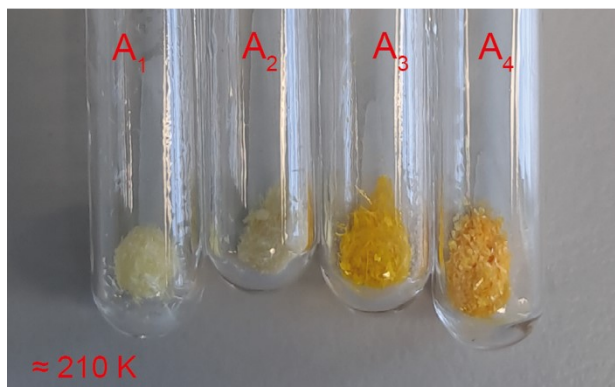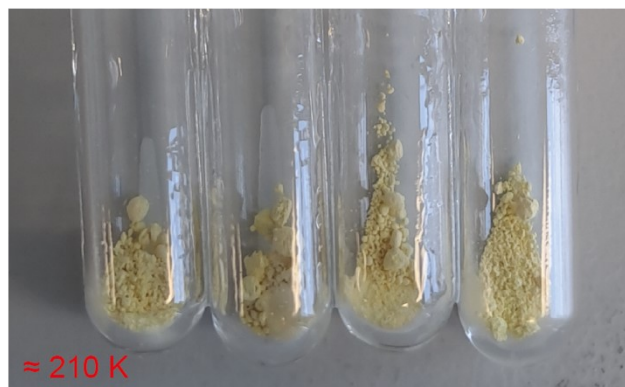

**Figure S9.** (Left) thermochromic properties of  $A_1$ - $A_4$  at room temperature (top) and 210 K (bottom). (Right) thermochromic properties of  $1>A_1$ - $1>A_4$  at room temperature (top) and 210 K (bottom).
